# Supplementary material
Source: publisher figshare collection journal article supplement (https://sage.figshare.com/ndownloader/files/15017303)
Supplement: Supplementary file 1 [file 15017303]

## **SUPPLEMENTARY METHODS**

### ***Report query and analysis***

#### *ADM Reports*

A “Proactive Diversion Report” was run in the C<sup>ll</sup> Safe®, then an additional report was run for each user listing all CS transactions (withdrawals, wastes, returns, cancellations, and overrides) across a 30-day period. Each user’s transactions were compared to patient charts in the EHR to ensure proper documentation of each dose.

#### *TPS Reports*

Each hospital’s 30-day report was accessed and downloaded from the RxAuditor® online portal. For the most analogous comparison to the ADM report, the “Rx Diversion Index – Total Count” report was used, which similarly provides a list of users identified as 3.0-3.99, 4.0-4.99, and 5.0 or more SDs greater than the mean for total CS transactions over a 30-day period. Each user’s individualized report was accessed, and each transaction was compared to patient charts in the EHR to ensure proper documentation of each dose.

#### *EHR Reports*

The “Unreconciled Dispenses” report was customized to generate a list of individuals across a 30-day period with dispensed doses that were not reconciled with a subsequent associated “given” documentation in MAR. The report was designed to produce order IDs, order names, dispense users, dispense quantity, order history date and time, dispensing pharmacy or ADM, and frequency. The report was exported to a

spreadsheet file to allow further investigation. All unreconciled dispenses of users with four or more unreconciled dispenses were further investigated to allow a similar number of comparisons against the ADM report. Each order ID was investigated through MAR charting to ensure proper documentation of each dose.
